# Supplementary material for: Experimental and Modelling Studies of Water Sorption Properties of Cellulosic Derivative Fibers.
Source: Research Square preprint supplement (doi:10.21203/rs.3.rs-586610/v1), 2021-06-21
Supplement: Supplementary file 1 [file 7c8b6bbbfcdc64a6046fd60c.docx]

Supporting information

**Experimental and modelling studies of water sorption properties of cellulosic derivative fibers**

*M. Simon, R. Fulchiron, F. Gouanvé*

S1: Deconvolution of X-ray diffraction curve of **(a)** C, **(b)** F, **(c)** V and **(d)** CA

| **(a)** | **(d)**  **(b)** |
| --- | --- |
| **(c)** |  |

S2: Evolution of the sorption mass gain versus water activity in **(a)** Langmuir **(b)** Henry and **(c)** clustering modes for C, F, V and CA fibers

| **(a)** |
| --- |
| **(b)** |
| **(c)** |
